# Supplementary material
Source: PubMed Central journal article supplement (PMC4159411)
Supplement: NIHMS603975-supplement-supplementary.pdf [file NIHMS603975-supplement-supplementary.pdf]

# Nanoparticles of Esterified Polymalic Acid for Controlled Anticancer Drug Release

Alberto Lanz-Landázuri,<sup>1</sup> José Portilla-Arias,<sup>2</sup> Antxon Martínez de Ilarduya,<sup>1</sup> Montserrat García-Alvarez,<sup>1</sup> Eggehard Holler,<sup>2</sup> Julia Ljubimova,<sup>2</sup> Sebastián Muñoz-Guerra<sup>1\*</sup>

<sup>1</sup>Departament d'Enginyeria Química, Universitat Politècnica de Catalunya, ETSEIB, Diagonal 647, 08028, Barcelona Spain.

<sup>2</sup>Nanomedicine Research Center, Department of Neurosurgery, Cedars-Sinai Medical Center, 127 S. San Vicente Blvd. AHSP-A8220, Los Angeles, CA 90048, USA.

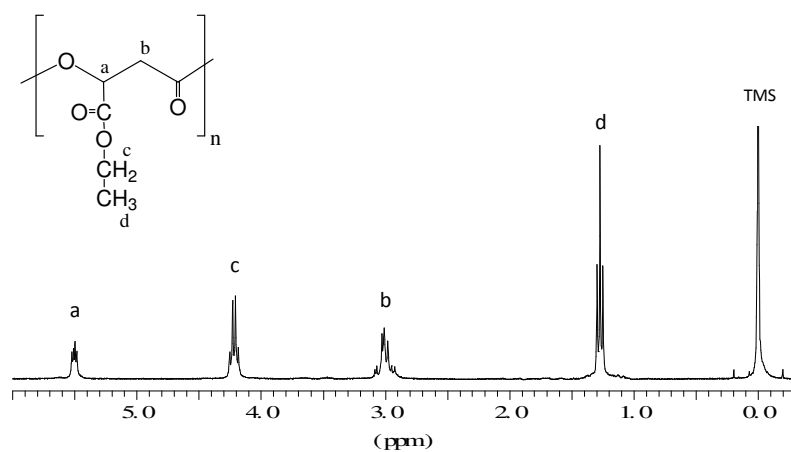

**Figure S1.** <sup>1</sup>H NMR spectrum of PMLA-Et<sub>100</sub>.

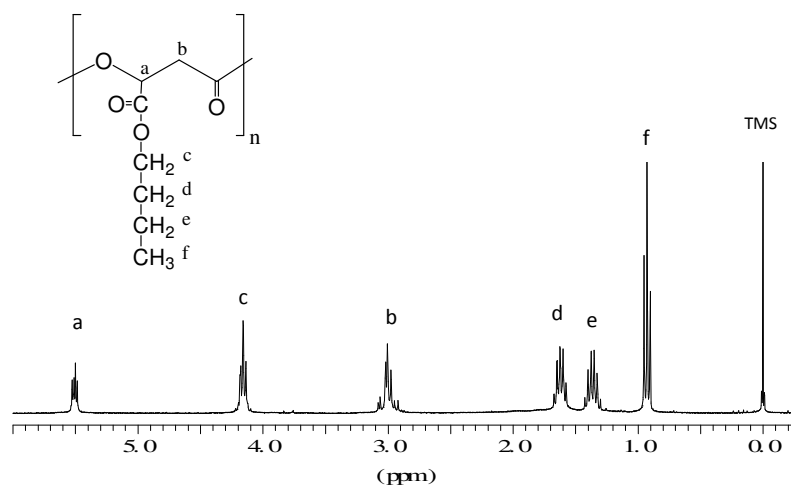

**Figure S2.** <sup>1</sup>H NMR spectrum of PMLA-Bu<sub>100</sub>.

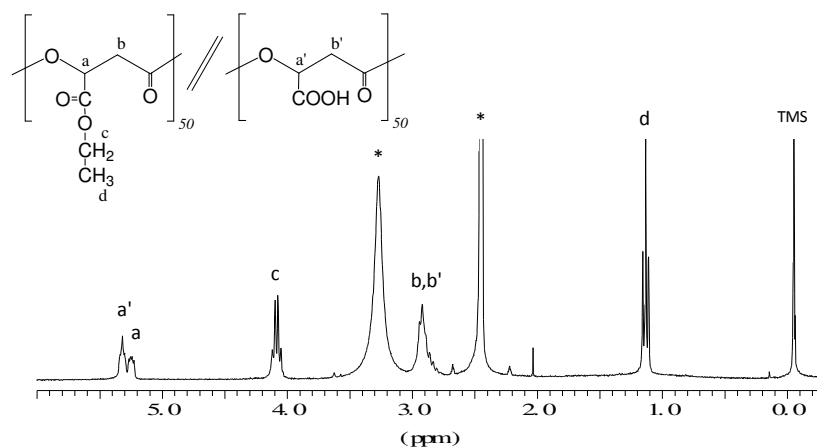

**Figure S3.** <sup>1</sup>H NMR spectrum of *coPMLA-Et*<sub>50</sub>*H*<sub>50</sub>. (\*) DMSO and water solvent peaks.

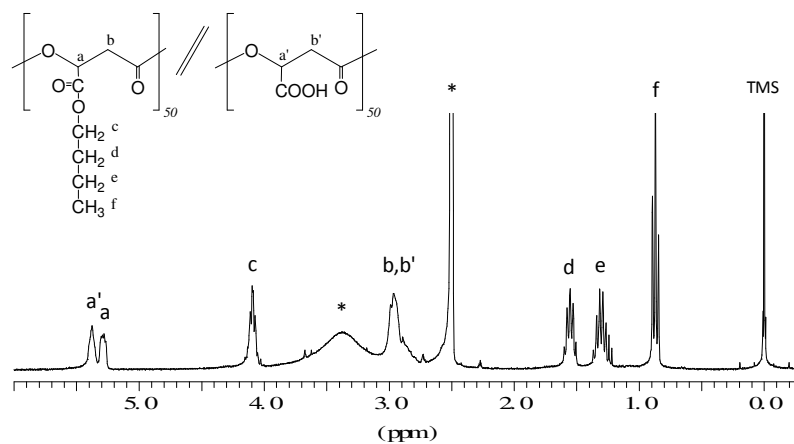

**Figure S4.** <sup>1</sup>H NMR spectrum of *coPMLA-Bu*<sub>50</sub>*H*<sub>50</sub>. (\*) DMSO and water solvent peaks.

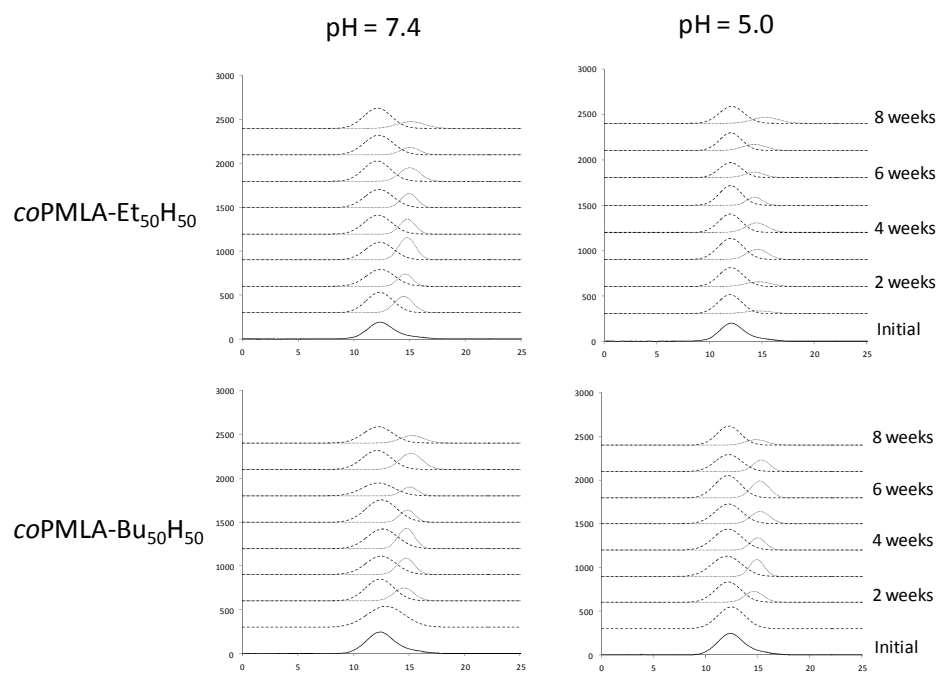

**Figure S5.** Deconvoluted GPC chromatograms of *coPMLA-Et*<sub>50</sub>*H*<sub>50</sub> and *coPMLA-Bu*<sub>50</sub>*H*<sub>50</sub> after incubation in aqueous buffer at pH 7.4 and 5.0 for the indicated times.

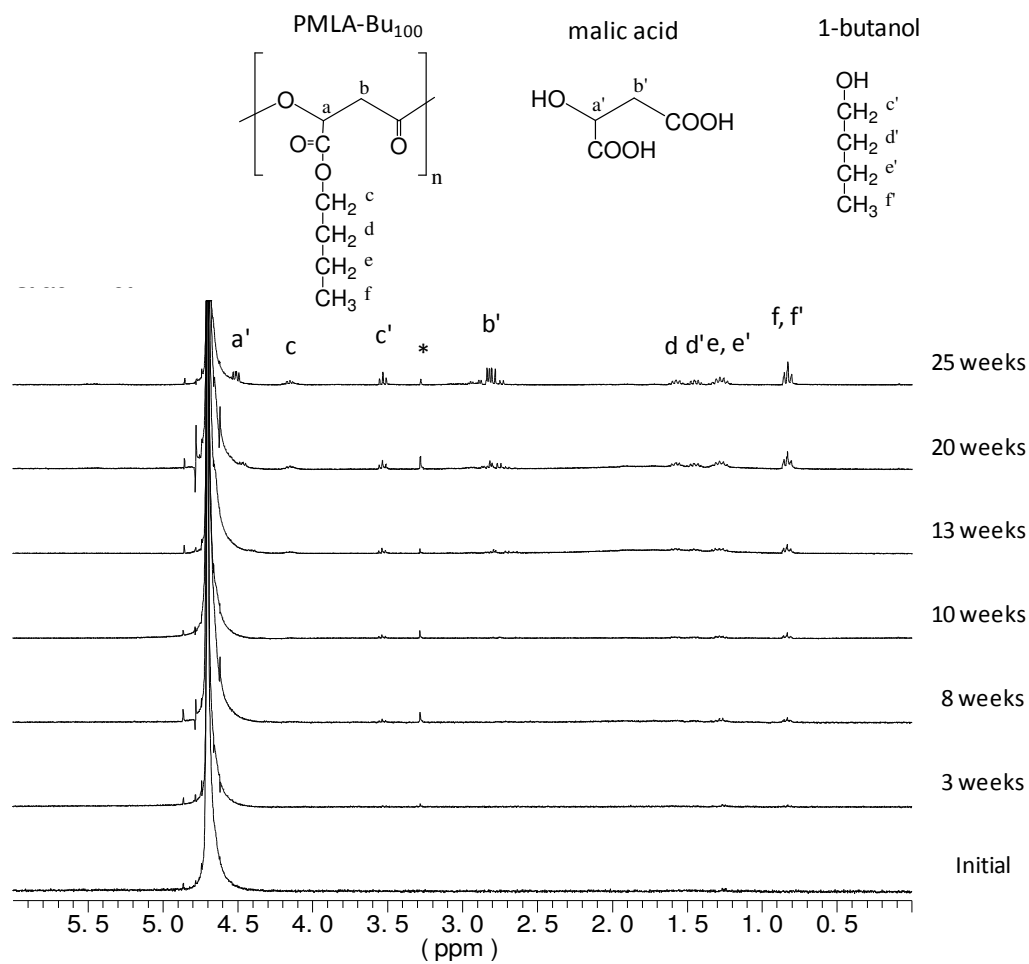

**Figure S6.** <sup>1</sup>H NMR spectra of the degradation products of PMLA-Bu<sub>100</sub> incubated at pH 7.4 and 37 °C. (\*) impurity.

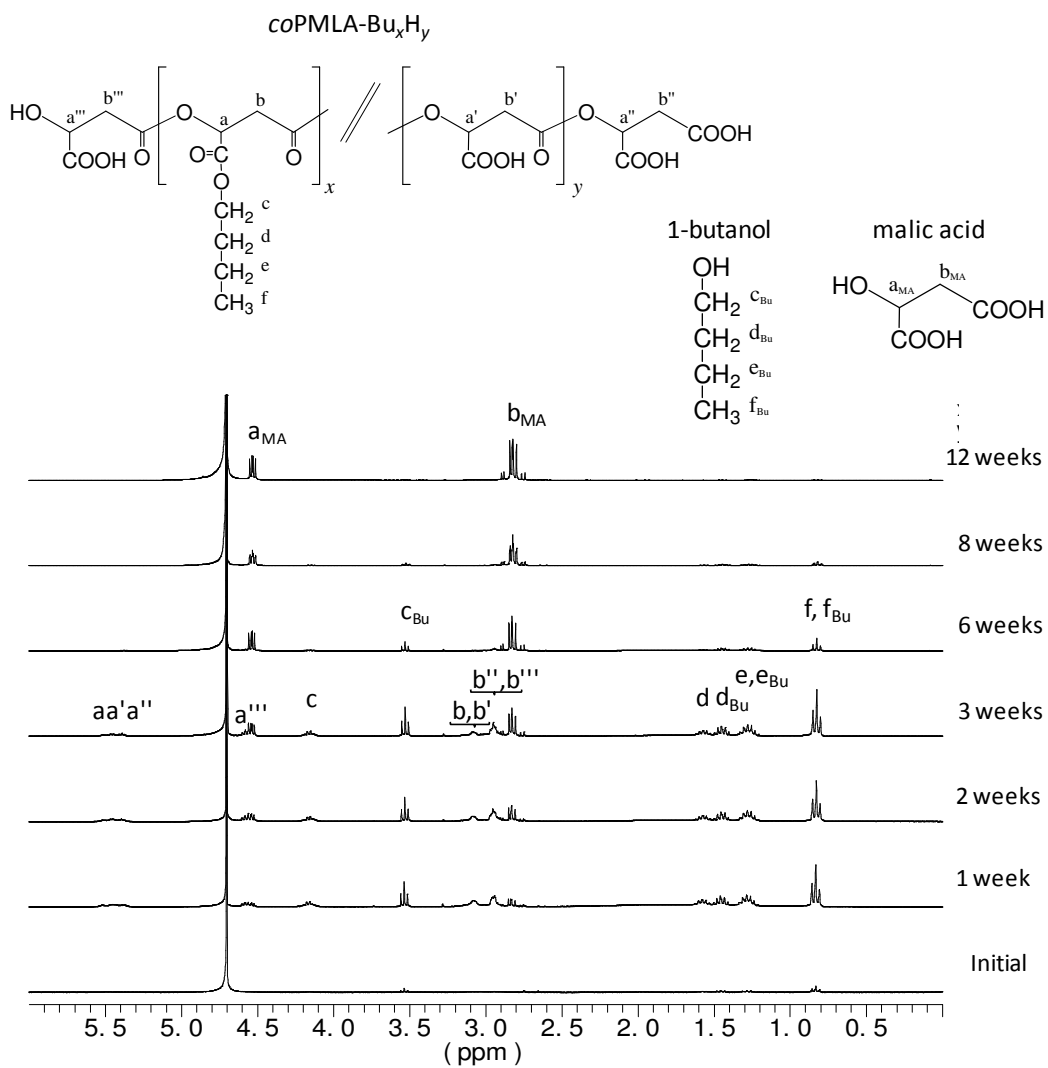

**Figure S7.**  $^1\text{H}$  NMR spectra of the degradation products of  $coPMLA-Bu_{50}H_{50}$  incubated at pH 7.4 and  $37^\circ\text{C}$ .

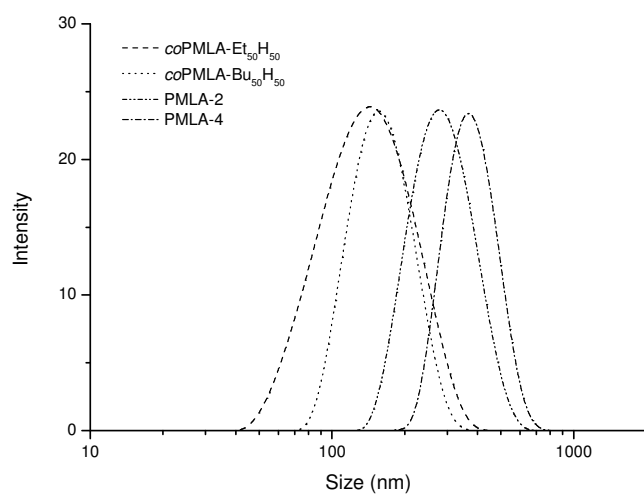

**Figure S8.** Particle size distributions profiles measured by light scattering.
